# Supplementary material
Source: PubMed Central journal article supplement (PMC9703359)
Supplement: NIHMS1849099-supplement-2.pdf [file NIHMS1849099-supplement-2.pdf]

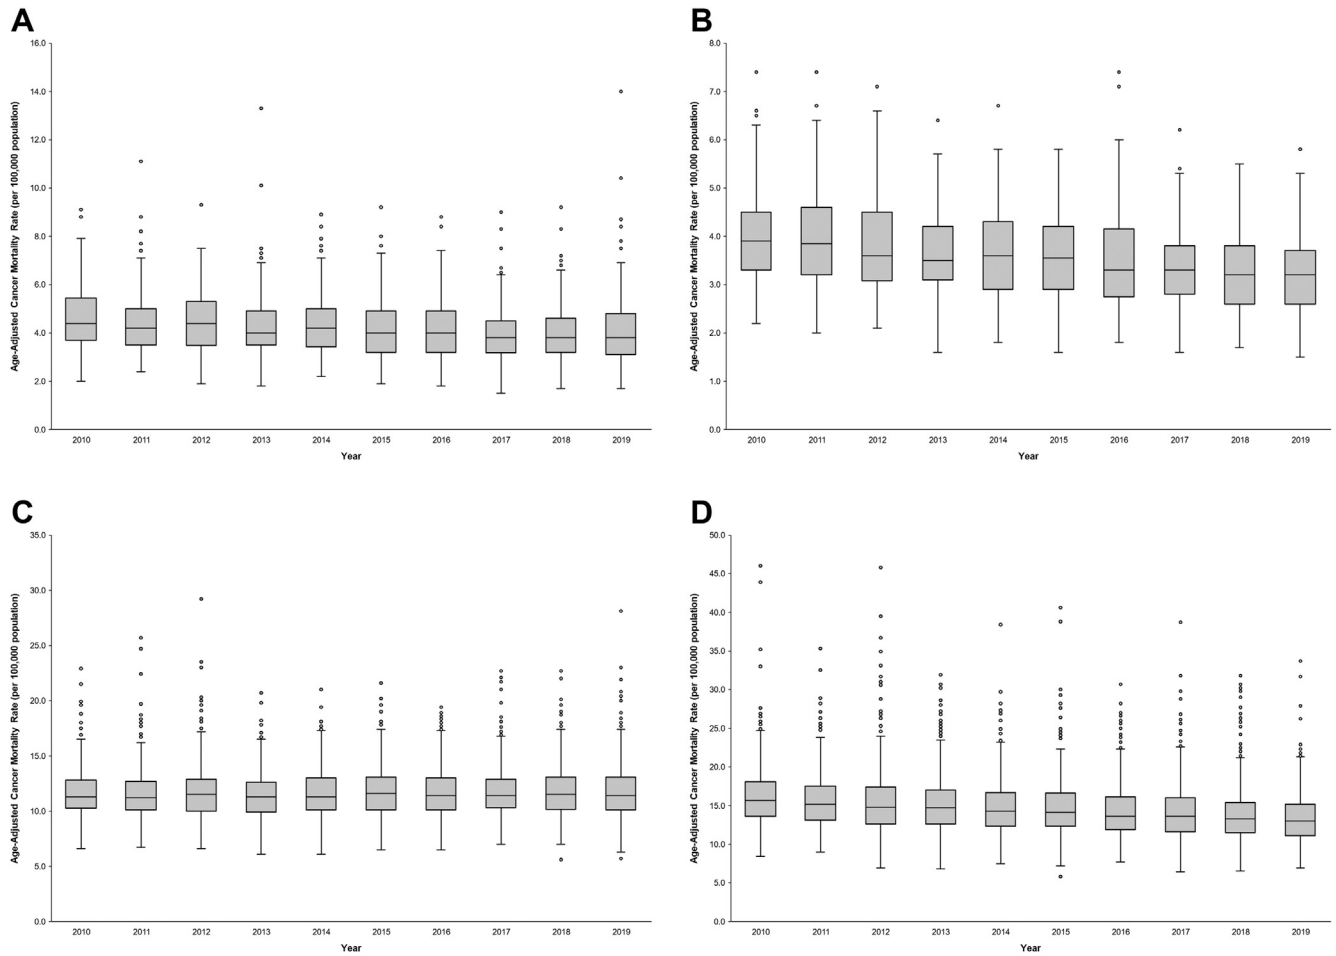

**Supplementary Figure 1.** Box and whisker plot of age-adjusted mortality rate for GI cancers over time. Boxes represents IQR with median line, outliers defined as being  $>1.5x$  the IQR  $>75$ th percentile or  $<25$ th percentile. (A) Esophageal cancer, (B) gastric cancer, (C) pancreatic cancer, (D) colorectal cancer.
