# Supplementary material
Source: PubMed Central journal article supplement (PMC9703359)
Supplement: NIHMS1849099-supplement-Supplementary_materials.pdf [file NIHMS1849099-supplement-Supplementary_materials.pdf]

**Supplementary Table 1.** ICD-10 diagnostic coding for gastrointestinal cancers

| <b>Cancer Type</b> | <b>ICD-10 Diagnostic Codes</b>                                                                                                                                                                                                                                                                                                                                                                                                                                                                                                                                         |
|--------------------|------------------------------------------------------------------------------------------------------------------------------------------------------------------------------------------------------------------------------------------------------------------------------------------------------------------------------------------------------------------------------------------------------------------------------------------------------------------------------------------------------------------------------------------------------------------------|
| Esophageal cancer  | C15.0 cervical part of esophagus – malignant neoplasms<br>C15.1 thoracic part of esophagus – malignant neoplasms<br>C15.2 abdominal part of esophagus – malignant neoplasms<br>C15.3 upper third of esophagus – malignant neoplasms<br>C15.4 middle third of esophagus – malignant neoplasms<br>C15.5 lower third of esophagus – malignant neoplasms<br>C15.8 overlapping lesion of esophagus – malignant neoplasms<br>C15.9 esophagus unspecified – malignant neoplasms                                                                                               |
| Stomach cancer     | C16.0 cardia – malignant neoplasms<br>C16.1 fundus of stomach – malignant neoplasms<br>C16.2 body of stomach – malignant neoplasms<br>C16.3 pyloric antrum – malignant neoplasms<br>C16.4 pylorus – malignant neoplasms<br>C16.5 lesser curvature of stomach, unspecified – malignant neoplasms<br>C16.6 greater curvature of stomach, unspecified – malignant neoplasms<br>C16.8 overlapping lesion of stomach – malignant neoplasms<br>C16.9 stomach unspecified – malignant neoplasms                                                                               |
| Colorectal cancer  | C18.0 cecum – malignant neoplasms<br>C18.1 appendix – malignant neoplasms<br>C18.2 ascending colon – malignant neoplasms<br>C18.3 hepatic flexure – malignant neoplasms<br>C18.4 transverse colon – malignant neoplasms<br>C18.5 splenic flexure – malignant neoplasms<br>C18.6 descending colon – malignant neoplasms<br>C18.7 sigmoid colon – malignant neoplasms<br>C18.8 overlapping lesion of colon – malignant neoplasms<br>C18.9 colon unspecified – malignant neoplasms<br>C19 malignant neoplasm of rectosigmoid junction<br>C20 malignant neoplasm of rectum |
| Pancreas cancer    | C25.0 head of pancreas – malignant neoplasms<br>C25.1 body of pancreas – malignant neoplasms<br>C25.2 tail of pancreas – malignant neoplasms<br>C25.3 pancreatic duct – malignant neoplasms<br>C25.4 endocrine pancreas – malignant neoplasms<br>C25.7 other parts of pancreas – malignant neoplasms<br>C25.8 overlapping lesion of pancreas – malignant neoplasms<br>C25.9 pancreas unspecified – malignant neoplasms                                                                                                                                                 |

**Supplementary Table 2.** Total deaths from gastrointestinal cancers (2010-2019)

| Cancer type | Counties included* | Deaths in adults aged 25-84 years; 2010-2019 | Deaths captured by included counties, N (% total) |
|-------------|--------------------|----------------------------------------------|---------------------------------------------------|
| Esophageal  | 1,315              | 150,533                                      | 145,668 (96.7)                                    |
| Gastric     | 826                | 112,036                                      | 105,487 (94.2)                                    |
| Pancreas    | 2,174              | 411,531                                      | 409,358 (99.4)                                    |
| Colorectal  | 2,449              | 516,517                                      | 515,126 (99.7)                                    |

\*Excludes counties with fewer than 20 gastrointestinal cancer-related deaths as age-adjusted rates are unreliable

**Supplementary Table 3.** County-level differences in age-standardized mortality for gastrointestinal cancers, by time-period

| Cancer Type       | County-Level Age-Adjusted Mortality Rate<br>(Per 100,000) |                                |        |                                |         | 90 <sup>th</sup> minus 10 <sup>th</sup><br>percentile<br>(deaths/100,000<br>population) | 90 <sup>th</sup> /10 <sup>th</sup><br>percentile<br>Ratio |
|-------------------|-----------------------------------------------------------|--------------------------------|--------|--------------------------------|---------|-----------------------------------------------------------------------------------------|-----------------------------------------------------------|
|                   | Minimum                                                   | 10 <sup>th</sup><br>Percentile | Median | 90 <sup>th</sup><br>Percentile | Maximum |                                                                                         |                                                           |
| <b>Esophagus</b>  |                                                           |                                |        |                                |         |                                                                                         |                                                           |
| <i>2010-2014</i>  | 1.9                                                       | 3.3                            | 4.6    | 6.3                            | 10.6    | 3.0                                                                                     | 1.9                                                       |
| <i>2015-2019</i>  | 1.7                                                       | 3.0                            | 4.3    | 6.2                            | 9.5     | 3.2                                                                                     | 2.0                                                       |
| <b>Stomach</b>    |                                                           |                                |        |                                |         |                                                                                         |                                                           |
| <i>2010-2014</i>  | 1.6                                                       | 2.3                            | 3.2    | 4.5                            | 10.3    | 2.2                                                                                     | 2.0                                                       |
| <i>2015-2019</i>  | 1.3                                                       | 2.0                            | 2.8    | 4.2                            | 8.7     | 2.2                                                                                     | 2.1                                                       |
| <b>Pancreas</b>   |                                                           |                                |        |                                |         |                                                                                         |                                                           |
| <i>2010-2014</i>  | 5.9                                                       | 9.0                            | 11.2   | 14.2                           | 27.5    | 5.2                                                                                     | 1.6                                                       |
| <i>2015-2019</i>  | 6.4                                                       | 9.3                            | 11.5   | 14.6                           | 30.7    | 5.3                                                                                     | 1.6                                                       |
| <b>Colorectal</b> |                                                           |                                |        |                                |         |                                                                                         |                                                           |
| <i>2010-2014</i>  | 6.3                                                       | 12.0                           | 15.9   | 21.8                           | 46.4    | 9.8                                                                                     | 1.8                                                       |
| <i>2015-2019</i>  | 5.8                                                       | 11.2                           | 14.9   | 20.7                           | 49.2    | 9.5                                                                                     | 1.9                                                       |

**Supplementary Table 4.** Within state variability in gastrointestinal cancer-related mortality, expressed as the ratio between the highest vs. lowest mortality county

| Esophageal Cancer |       | Gastric Cancer |       | Pancreatic Cancer |       | Colorectal Cancer |       |
|-------------------|-------|----------------|-------|-------------------|-------|-------------------|-------|
| State             | Ratio | State          | Ratio | State             | Ratio | State             | Ratio |
| Nebraska          | 1.24  | Oklahoma       | 1.28  | South Dakota      | 1.09  | New Hampshire     | 1.32  |
| Oklahoma          | 1.30  | Louisiana      | 1.28  | New Hampshire     | 1.10  | Massachusetts     | 1.38  |
| Arkansas          | 1.32  | Massachusetts  | 1.37  | Nebraska          | 1.11  | Oklahoma          | 1.39  |
| New Hampshire     | 1.32  | Kentucky       | 1.47  | Massachusetts     | 1.13  | Idaho             | 1.46  |
| Massachusetts     | 1.36  | Wisconsin      | 1.49  | Montana           | 1.13  | Arizona           | 1.48  |
| Alabama           | 1.37  | Illinois       | 1.50  | Oklahoma          | 1.13  | Minnesota         | 1.53  |
| South Carolina    | 1.39  | Arizona        | 1.51  | North Dakota      | 1.16  | Louisiana         | 1.55  |
| Mississippi       | 1.42  | Arkansas       | 1.51  | Minnesota         | 1.16  | Pennsylvania      | 1.55  |
| Maine             | 1.43  | Oregon         | 1.54  | Vermont           | 1.16  | Wisconsin         | 1.55  |
| Kansas            | 1.43  | Pennsylvania   | 1.55  | Louisiana         | 1.17  | South Dakota      | 1.55  |
| Minnesota         | 1.44  | Mississippi    | 1.56  | Maine             | 1.17  | Nebraska          | 1.55  |
| West Virginia     | 1.45  | Georgia        | 1.58  | Idaho             | 1.17  | Vermont           | 1.58  |
| Ohio              | 1.46  | Florida        | 1.61  | Washington        | 1.18  | Maine             | 1.59  |
| Kentucky          | 1.46  | Ohio           | 1.61  | Wyoming           | 1.18  | Oregon            | 1.62  |
| Vermont           | 1.47  | New Jersey     | 1.63  | Arizona           | 1.19  | New Jersey        | 1.63  |
| Missouri          | 1.49  | Washington     | 1.64  | Wisconsin         | 1.19  | Kentucky          | 1.64  |
| Tennessee         | 1.51  | Indiana        | 1.65  | Ohio              | 1.19  | Washington        | 1.64  |
| Arizona           | 1.54  | Alabama        | 1.66  | New York          | 1.19  | Kansas            | 1.65  |
| Louisiana         | 1.57  | Texas          | 1.67  | Kansas            | 1.19  | Arkansas          | 1.65  |
| Wisconsin         | 1.57  | South Carolina | 1.69  | Kentucky          | 1.19  | Ohio              | 1.65  |
| Iowa              | 1.57  | New York       | 1.70  | Oregon            | 1.20  | Wyoming           | 1.65  |
| Pennsylvania      | 1.61  | Michigan       | 1.70  | Utah              | 1.20  | New York          | 1.65  |
| Illinois          | 1.62  | Tennessee      | 1.70  | Illinois          | 1.20  | Illinois          | 1.66  |
| Oregon            | 1.65  | Minnesota      | 1.71  | New Jersey        | 1.20  | North Dakota      | 1.67  |
| Washington        | 1.65  | Missouri       | 1.72  | Iowa              | 1.21  | West Virginia     | 1.67  |
| Indiana           | 1.69  | New Mexico     | 1.75  | Indiana           | 1.22  | Iowa              | 1.68  |
| Colorado          | 1.73  | Maryland       | 1.76  | Pennsylvania      | 1.22  | Alabama           | 1.69  |
| North Carolina    | 1.78  | California     | 1.82  | West Virginia     | 1.22  | Florida           | 1.69  |
| New Jersey        | 1.81  | Virginia       | 1.98  | Colorado          | 1.24  | Mississippi       | 1.69  |
| Michigan          | 1.82  | North Carolina | 2.25  | Michigan          | 1.25  | Missouri          | 1.73  |
| New Mexico        | 1.95  |                |       | New Mexico        | 1.26  | Texas             | 1.75  |
| Georgia           | 2.00  |                |       | Missouri          | 1.26  | South Carolina    | 1.77  |
| Virginia          | 2.04  |                |       | California        | 1.27  | New Mexico        | 1.78  |
| Texas             | 2.08  |                |       | Mississippi       | 1.30  | Michigan          | 1.78  |
| California        | 2.37  |                |       | Tennessee         | 1.31  | Maryland          | 1.79  |
| Maryland          | 2.44  |                |       | South Carolina    | 1.32  | Utah              | 1.79  |
| New York          | 2.60  |                |       | Maryland          | 1.33  | Indiana           | 1.81  |
| Florida           | 2.93  |                |       | Alabama           | 1.34  | Montana           | 1.81  |
|                   |       |                |       | Arkansas          | 1.34  | Tennessee         | 1.88  |
|                   |       |                |       | Georgia           | 1.35  | Georgia           | 1.94  |
|                   |       |                |       | Texas             | 1.36  | California        | 1.96  |
|                   |       |                |       | Florida           | 1.36  | Colorado          | 1.98  |
|                   |       |                |       | North Carolina    | 1.44  | North Carolina    | 2.09  |
|                   |       |                |       | Virginia          | 1.44  | Virginia          | 2.26  |

**Supplementary Table 5.** Models evaluating factors associated with statewide variability in esophageal cancer mortality

| Variable                     | 2011    | 2012   | 2013   | 2014   | 2015    | 2016  | 2017   | 2018   | 2019  |
|------------------------------|---------|--------|--------|--------|---------|-------|--------|--------|-------|
| % uninsured                  | 0.01    | -0.06  | -0.01  | 0.006  | 0.01    | -0.04 | -0.07  | -0.02  | -0.03 |
| Racial composition           |         |        |        |        |         |       |        |        |       |
| % Non-Hispanic white         | Ref     | Ref    | Ref    | Ref    | Ref     | Ref   | Ref    | Ref    | Ref   |
| % Hispanic white             | -0.08   | -0.03  | -0.03  | -0.07  | -0.05   | -0.06 | -0.06  | -0.05  | -0.05 |
| % Non-Hispanic Black         | -0.06   | -0.03  | -0.02  | -0.08  | -0.04   | -0.07 | -0.07  | -0.08  | -0.06 |
| % Hispanic Black             | 0.49    | -0.25  | 0.11   | 0.34   | 0.07    | 0.46  | -0.17  | 0.05   | 0.13  |
| % Asian                      | -0.01   | -0.04  | -0.04  | -0.04  | -0.03   | -0.04 | -0.05  | -0.03  | -0.03 |
| % Native American            | 0.01    | -0.01  | -0.04  | -0.05  | 0.01    | 0.10  | 0.03   | 0.02   | 0.06  |
| % with obesity               | 0.04    | -0.04  | 0.10   | 0.01   | 0.05    | 0.11  | -0.04  | 0.07   | 0.13  |
| % with diabetes              | 0.01    | 0.31   | -0.09  | 0.14   | -0.19   | -0.04 | 0.16   | -0.01  | 0.04  |
| % cigarette use              | 0.067   | 0.04   | 0.04   | 0.09   | 0.13    | 0.17  | 0.07   | 0.04   | 0.04  |
| % heavy alcohol use          | 0.03    | 0.27   | 0.17   | 0.35   | 0.38    | 0.30  | 0.30   | 0.10   | 0.34  |
| Rural/urban status           |         |        |        |        |         |       |        |        |       |
| % Large metropolitan         | Ref     | Ref    | Ref    | Ref    | Ref     | Ref   | Ref    | Ref    | Ref   |
| % Small/medium metropolitan  | -0.005  | -0.006 | -0.004 | -0.002 | -0.006  | 0.002 | -0.004 | -0.001 | -0.01 |
| % Rural                      | -0.0007 | -0.003 | -0.005 | -0.01  | -0.0001 | -0.04 | -0.01  | -0.02  | -0.01 |
| Overall Model R <sup>2</sup> | 0.36    | 0.56   | 0.41   | 0.47   | 0.62    | 0.53  | 0.49   | 0.53   | 0.45  |

Beta coefficients with a positive value associated with increased county-level cancer-related mortality. Selected variables that were significantly associated in primary county-level models

**Supplementary Table 6.** Models evaluating factors associated with statewide variability in gastric cancer mortality

| Variable                     | 2011  | 2012  | 2013  | 2014   | 2015   | 2016   | 2017  | 2018   | 2019   |
|------------------------------|-------|-------|-------|--------|--------|--------|-------|--------|--------|
| % uninsured                  | -0.11 | -0.04 | 0.10  | -0.02  | -0.07  | 0.005  | -0.09 | -0.10  | -0.06  |
| Racial composition           |       |       |       |        |        |        |       |        |        |
| % Non-Hispanic white         | Ref   | Ref   | Ref   | Ref    | Ref    | Ref    | Ref   | Ref    | Ref    |
| % Hispanic white             | 0.07  | 0.03  | 0.17  | 0.02   | 0.02   | 0.003  | 0.04  | 0.06   | 0.03   |
| % Non-Hispanic Black         | 0.07  | 0.05  | 0.06  | 0.04   | 0.07   | 0.03   | 0.05  | 0.08   | 0.05   |
| % Hispanic Black             | 0.05  | 0.61  | 0.53  | 0.33   | 0.32   | 0.55   | 0.38  | -0.05  | 0.22   |
| % Asian                      | 0.06  | 0.05  | 0.07  | 0.06   | 0.05   | 0.05   | 0.02  | 0.02   | 0.04   |
| % Native American            | 0.06  | 0.12  | 0.17  | 0.13   | 0.16   | 0.16   | 0.11  | 0.16   | 0.06   |
| % with obesity               | -0.05 | 0.003 | -0.02 | 0.03   | 0.06   | 0.06   | 0.006 | 0.02   | 0.03   |
| % with diabetes              | 0.17  | 0.17  | 0.05  | 0.27   | 0.14   | 0.05   | 0.16  | 0.11   | 0.09   |
| % cigarette use              | 0.09  | 0.05  | 0.11  | -0.03  | -0.05  | -0.007 | -0.03 | -0.03  | -0.03  |
| % heavy alcohol use          | 0.03  | 0.10  | 0.12  | 0.10   | 0.27   | 0.13   | 0.07  | 0.10   | 0.12   |
| Rural/urban status           |       |       |       |        |        |        |       |        |        |
| % Large metropolitan         | Ref   | Ref   | Ref   | Ref    | Ref    | Ref    | Ref   | Ref    | Ref    |
| % Small/medium metropolitan  | 0.005 | 0.005 | 0.002 | 0.007  | 0.005  | 0.007  | 0.007 | -0.004 | -0.006 |
| % Rural                      | 0.01  | 0.004 | 0.003 | -0.009 | -0.001 | -0.02  | 0.003 | 0.006  | 0.01   |
| Overall Model R <sup>2</sup> | 0.64  | 0.51  | 0.46  | 0.69   | 0.75   | 0.62   | 0.59  | 0.75   | 0.64   |

Beta coefficients with a positive value associated with increased county-level cancer-related mortality. Selected variables that were significantly associated in primary county-level models

**Supplementary Table 7.** Models evaluating factors associated with statewide variability in pancreatic cancer mortality

| Variable                     | 2011  | 2012  | 2013   | 2014   | 2015   | 2016  | 2017   | 2018   | 2019   |
|------------------------------|-------|-------|--------|--------|--------|-------|--------|--------|--------|
| % uninsured                  | -0.11 | -0.15 | -0.05  | -0.006 | -0.09  | -0.11 | -0.13  | -0.08  | -0.11  |
| Racial composition           |       |       |        |        |        |       |        |        |        |
| % Non-Hispanic white         | Ref   | Ref   | Ref    | Ref    | Ref    | Ref   | Ref    | Ref    | Ref    |
| % Hispanic white             | -0.03 | -0.07 | 0.03   | -0.07  | -0.06  | -0.03 | -0.04  | -0.04  | -0.02  |
| % Non-Hispanic Black         | 0.02  | 0.03  | 0.07   | 0.03   | 0.03   | 0.06  | 0.02   | 0.02   | 0.01   |
| % Hispanic Black             | 0.35  | 0.27  | 0.37   | 0.22   | 0.10   | 0.82  | 0.13   | 0.32   | 0.001  |
| % Asian                      | 0.01  | 0.009 | 0.004  | 0.03   | 0.01   | 0.008 | -0.008 | -0.02  | -0.001 |
| % Native American            | 0.05  | 0.07  | 0.04   | -0.08  | 0.04   | 0.12  | -0.05  | -0.13  | -0.08  |
| % with obesity               | 0.10  | 0.15  | 0.21   | 0.17   | 0.17   | 0.27  | 0.10   | 0.10   | 0.07   |
| % with diabetes              | 0.22  | 0.83  | -0.032 | -0.07  | 0.40   | -0.26 | 0.41   | -0.02  | 0.05   |
| % cigarette use              | 0.06  | -0.23 | -0.06  | 0.04   | -0.14  | 0.007 | -0.08  | 0.09   | 0.11   |
| % heavy alcohol use          | 0.34  | 0.37  | -0.03  | 0.09   | 0.52   | 0.20  | 0.51   | 0.01   | 0.22   |
| Rural/urban status           |       |       |        |        |        |       |        |        |        |
| % Large metropolitan         | Ref   | Ref   | Ref    | Ref    | Ref    | Ref   | Ref    | Ref    | Ref    |
| % Small/medium metropolitan  | 0.006 | 0.009 | -0.004 | -0.008 | -0.004 | 0.008 | -0.004 | -0.008 | -0.02  |
| % Rural                      | -0.02 | 0.02  | 0.01   | 0.02   | 0.001  | -0.01 | 0.003  | -0.005 | 0.003  |
| Overall Model R <sup>2</sup> | 0.33  | 0.47  | 0.15   | 0.42   | 0.44   | 0.36  | 0.35   | 0.51   | 0.30   |

Beta coefficients with a positive value associated with increased county-level cancer-related mortality. Selected variables that were significantly associated in primary county-level models

**Supplementary Table 8.** Models evaluating factors associated with statewide variability in colorectal cancer mortality

| Variable                     | 2011  | 2012  | 2013   | 2014   | 2015   | 2016  | 2017   | 2018   | 2019   |
|------------------------------|-------|-------|--------|--------|--------|-------|--------|--------|--------|
| % uninsured                  | 0.06  | 0.13  | -0.06  | -0.03  | 0.01   | 0.04  | -0.03  | 0.10   | 0.07   |
| Racial composition           |       |       |        |        |        |       |        |        |        |
| % Non-Hispanic white         | Ref   | Ref   | Ref    | Ref    | Ref    | Ref   | Ref    | Ref    | Ref    |
| % Hispanic white             | 0.05  | -0.01 | 0.02   | -0.03  | -0.02  | -0.02 | 0.02   | -0.008 | -0.05  |
| % Non-Hispanic Black         | -0.01 | 0.02  | 0.0004 | 0.05   | 0.02   | 0.004 | 0.04   | 0.003  | 0.19   |
| % Hispanic Black             | 0.67  | 1.11  | 0.23   | -0.03  | 0.07   | -0.12 | -0.36  | -0.03  | -0.36  |
| % Asian                      | 0.07  | 0.08  | 0.10   | 0.06   | -0.002 | 0.04  | 0.03   | 0.02   | 0.05   |
| % Native American            | -0.31 | 0.05  | 0.15   | 0.22   | 0.08   | 0.05  | 0.14   | 0.90   | 0.10   |
| % with obesity               | 0.47  | 0.36  | 0.46   | 0.34   | 0.13   | 0.20  | 0.13   | 0.36   | 0.19   |
| % with diabetes              | -0.35 | -0.03 | 0.36   | 0.39   | 0.44   | 0.37  | 0.28   | 0.21   | 0.55   |
| % cigarette use              | 0.47  | 0.33  | 0.40   | 0.21   | 0.28   | 0.24  | 0.40   | 0.21   | 0.14   |
| % heavy alcohol use          | -0.12 | 0.02  | 0.22   | -0.004 | -0.31  | -0.17 | -0.03  | 0.008  | 0.08   |
| Rural/urban status           |       |       |        |        |        |       |        |        |        |
| % Large metropolitan         | Ref   | Ref   | Ref    | Ref    | Ref    | Ref   | Ref    | Ref    | Ref    |
| % Small/medium metropolitan  | 0.002 | -0.03 | -0.014 | -0.01  | -0.02  | -0.03 | -0.03  | -0.03  | -0.018 |
| % Rural                      | 0.02  | 0.04  | 0.003  | 0.02   | 0.03   | 0.04  | 0.0007 | 0.02   | 0.02   |
| Overall Model R <sup>2</sup> | 0.68  | 0.67  | 0.70   | 0.55   | 0.69   | 0.57  | 0.51   | 0.68   | 0.72   |

Beta coefficients with a positive value associated with increased county-level cancer-related mortality. Selected variables that were significantly associated in primary county-level models
